# Supplementary material for: Polysaccharides from European Black Elderberry Extract Enhance Dendritic Cell Mediated T Cell Immune Responses
Source: MDPI journal article supplement (doi:10.3390/ijms23073949), 2022-04-01
Supplement: s1 [file s1]

## Supplementary Figures

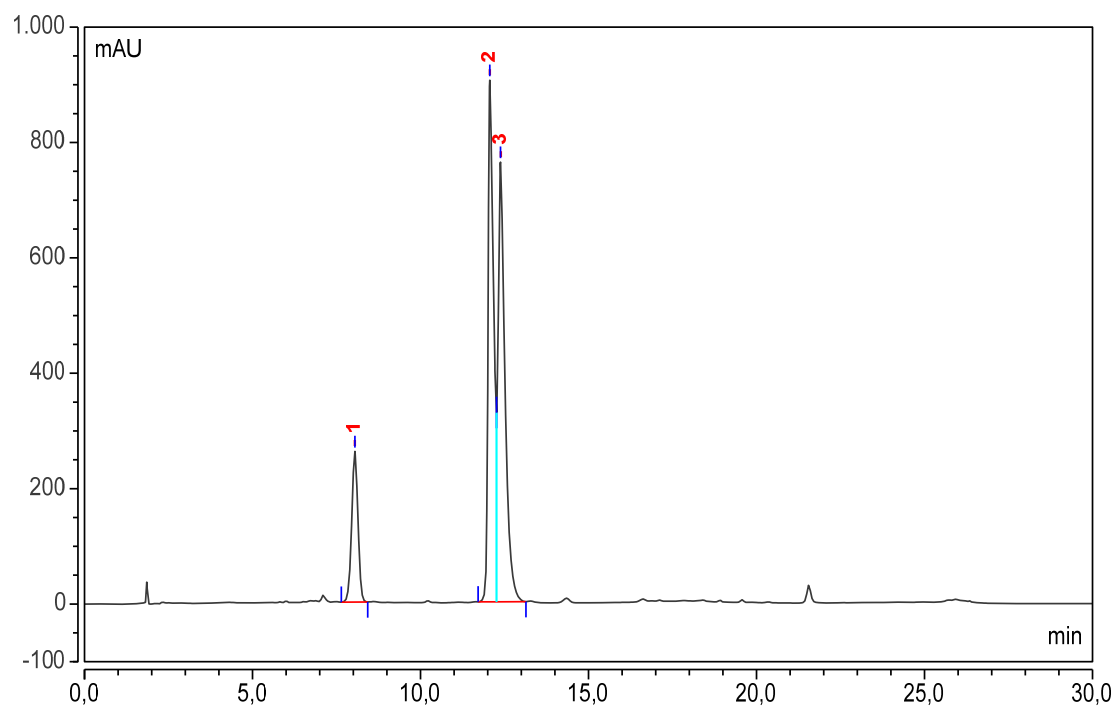

**Figure S1a**

HPLC Chromatogram of EC15. Peak 1: cyanidin-3-sambubioside-5-glucoside, peak 2 cyanidin-3-sambubioside, peak 3: cyanidin-3-glucoside. Absorbance at 520 nm

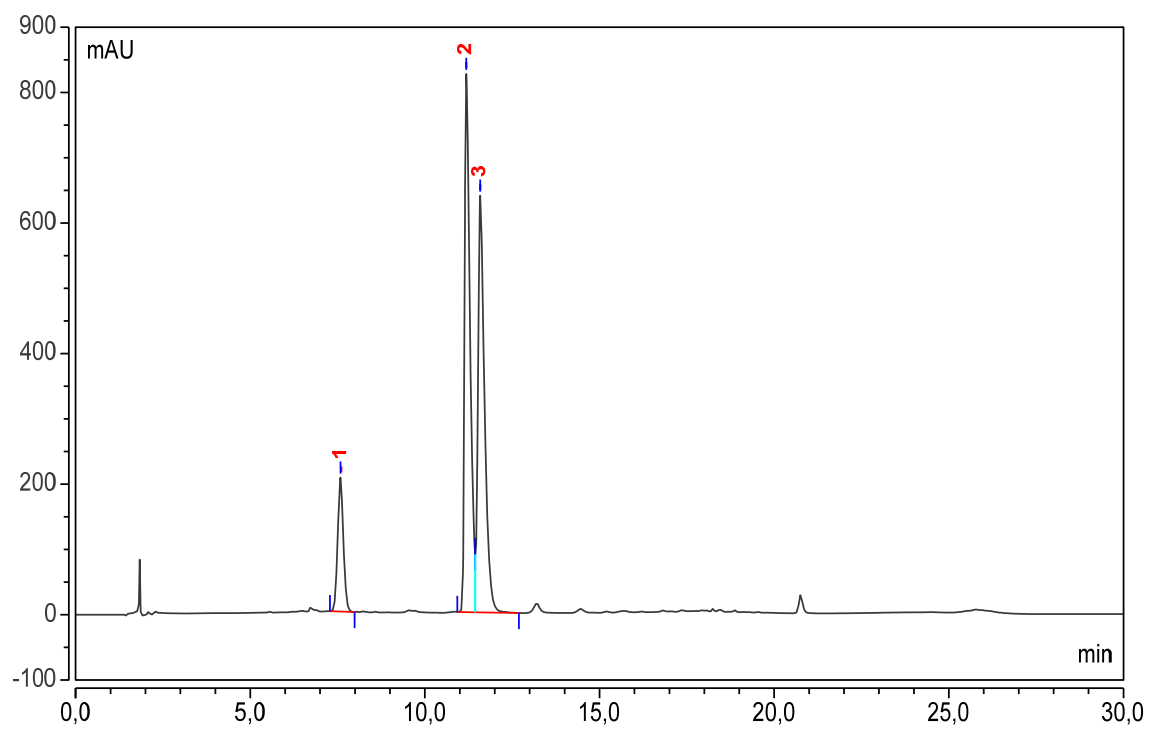

**Figure S1b**

HPLC Chromatogram of EE25. Peak 1: cyanidin-3-sambubioside-5-glucoside, peak 2: cyanidin-3-sambubioside, peak 3: cyanidin-3-glucoside. Absorbance at 520 nm
